# Supplementary material for: Hydro-Seq enables contamination-free high-throughput single-cell RNA-sequencing for circulating tumor cells
Source: PubMed Central journal article supplement (PMC6520360; doi:10.1038/s41467-019-10122-2), 2019-05-15
Supplement: 41467_2019_10122_MOESM2_ESM.pdf [file 41467_2019_10122_MOESM2_ESM.pdf]

## Reporting Summary

Nature Research wishes to improve the reproducibility of the work that we publish. This form provides structure for consistency and transparency in reporting. For further information on Nature Research policies, see [Authors & Referees](#) and the [Editorial Policy Checklist](#).

### Statistical parameters

When statistical analyses are reported, confirm that the following items are present in the relevant location (e.g. figure legend, table legend, main text, or Methods section).

n/a Confirmed

- The exact sample size ( $n$ ) for each experimental group/condition, given as a discrete number and unit of measurement
- An indication of whether measurements were taken from distinct samples or whether the same sample was measured repeatedly
- The statistical test(s) used AND whether they are one- or two-sided  
*Only common tests should be described solely by name; describe more complex techniques in the Methods section.*
- A description of all covariates tested
- A description of any assumptions or corrections, such as tests of normality and adjustment for multiple comparisons
- A full description of the statistics including central tendency (e.g. means) or other basic estimates (e.g. regression coefficient) AND variation (e.g. standard deviation) or associated estimates of uncertainty (e.g. confidence intervals)
- For null hypothesis testing, the test statistic (e.g.  $F$ ,  $t$ ,  $r$ ) with confidence intervals, effect sizes, degrees of freedom and  $P$  value noted  
*Give  $P$  values as exact values whenever suitable.*
- For Bayesian analysis, information on the choice of priors and Markov chain Monte Carlo settings
- For hierarchical and complex designs, identification of the appropriate level for tests and full reporting of outcomes
- Estimates of effect sizes (e.g. Cohen's  $d$ , Pearson's  $r$ ), indicating how they were calculated
- Clearly defined error bars  
*State explicitly what error bars represent (e.g. SD, SE, CI)*

*Our web collection on [statistics for biologists](#) may be useful.*

### Software and code

Policy information about [availability of computer code](#)

Data collection: NIS-Elements Basic Research for microscopy imaging

Data analysis: Seurat v2.0 and R 3.3 for single-cell transcriptome data analysis

For manuscripts utilizing custom algorithms or software that are central to the research but not yet described in published literature, software must be made available to editors/reviewers upon request. We strongly encourage code deposition in a community repository (e.g. GitHub). See the Nature Research [guidelines for submitting code & software](#) for further information.

### Data

Policy information about [availability of data](#)

All manuscripts must include a [data availability statement](#). This statement should provide the following information, where applicable:

- Accession codes, unique identifiers, or web links for publicly available datasets
- A list of figures that have associated raw data
- A description of any restrictions on data availability

The CTC sequencing data (Fig.2-5) presented in this paper have been deposited in the Sequence Read Archive (SRA) under BioProject accession number PRJNA471754.

## Field-specific reporting

Please select the best fit for your research. If you are not sure, read the appropriate sections before making your selection.

Life sciences       Behavioural & social sciences       Ecological, evolutionary & environmental sciences

For a reference copy of the document with all sections, see [nature.com/authors/policies/ReportingSummary-flat.pdf](https://www.nature.com/authors/policies/ReportingSummary-flat.pdf)

## Life sciences study design

All studies must disclose on these points even when the disclosure is negative.

|                 |                                                                                                                                                                                                                                           |
|-----------------|-------------------------------------------------------------------------------------------------------------------------------------------------------------------------------------------------------------------------------------------|
| Sample size     | <input type="text" value="We used 21 patient samples for the validation of our engineering tool."/>                                                                                                                                       |
| Data exclusions | <input type="text" value="If a sample has less than 5 CTCs isolated, we discard the sample."/>                                                                                                                                            |
| Replication     | <input type="text" value="We used a mouse cell line (3T3) and a human cell line (HEK) for reproducibility test in Fig.2. We also collected two tubes of blood from the same patient at the same time to show reproducibility in Fig.3."/> |
| Randomization   | <input type="text" value="N/A"/>                                                                                                                                                                                                          |
| Blinding        | <input type="text" value="N/A"/>                                                                                                                                                                                                          |

## Reporting for specific materials, systems and methods

### Materials & experimental systems

|                                     |                                                                 |
|-------------------------------------|-----------------------------------------------------------------|
| n/a                                 | Involvement in the study                                        |
| <input checked="" type="checkbox"/> | <input type="checkbox"/> Unique biological materials            |
| <input type="checkbox"/>            | <input checked="" type="checkbox"/> Antibodies                  |
| <input type="checkbox"/>            | <input checked="" type="checkbox"/> Eukaryotic cell lines       |
| <input checked="" type="checkbox"/> | <input type="checkbox"/> Palaeontology                          |
| <input checked="" type="checkbox"/> | <input type="checkbox"/> Animals and other organisms            |
| <input type="checkbox"/>            | <input checked="" type="checkbox"/> Human research participants |

### Methods

|                                     |                                                 |
|-------------------------------------|-------------------------------------------------|
| n/a                                 | Involvement in the study                        |
| <input checked="" type="checkbox"/> | <input type="checkbox"/> ChIP-seq               |
| <input checked="" type="checkbox"/> | <input type="checkbox"/> Flow cytometry         |
| <input checked="" type="checkbox"/> | <input type="checkbox"/> MRI-based neuroimaging |

## Antibodies

|                 |                                                                                              |
|-----------------|----------------------------------------------------------------------------------------------|
| Antibodies used | <input type="text" value="Mouse Anti-Human CD45 (clone HI30) BD Biosciences Cat # 555480."/> |
| Validation      | <input type="text" value="The antibody was validated by vendor."/>                           |

## Eukaryotic cell lines

Policy information about [cell lines](#)

|                                                                      |                                                                                                                                                                                                                                                                                                                           |
|----------------------------------------------------------------------|---------------------------------------------------------------------------------------------------------------------------------------------------------------------------------------------------------------------------------------------------------------------------------------------------------------------------|
| Cell line source(s)                                                  | <input type="text" value="MDA-MB-231 cells were obtained from Dr. Gary Luker's Lab (University of Michigan, MI, USA). MDA-MB-231 GFP cells were obtained from Dr. Celina Kleer's Lab (University of Michigan, MI, USA). HEK293 and 3T3 cells were obtained from Dr. Max Wicha's Lab (University of Michigan, MI, USA)."/> |
| Authentication                                                       | <input type="text" value="The cell lines were authenticated."/>                                                                                                                                                                                                                                                           |
| Mycoplasma contamination                                             | <input type="text" value="Mycoplasma contamination was done regularly and proved to be negative."/>                                                                                                                                                                                                                       |
| Commonly misidentified lines<br>(See <a href="#">ICLAC</a> register) | <input type="text" value="N/A"/>                                                                                                                                                                                                                                                                                          |

## Human research participants

---

Policy information about [studies involving human research participants](#)

Population characteristics

Study subjects consisted of women and men with metastatic breast cancer at any stage of treatment, with a minimum hemoglobin level to enable safe blood collection.

Recruitment

Subjects with metastatic breast cancer were recruited through the University of Michigan Breast Oncology Clinic.
